# Supplementary material for: A H2O2-Responsive Theranostic Probe for Endothelial Injury Imaging and Protection
Source: PubMed Central journal article supplement — Theranostics. 2017 Aug 23;7(15):3803–13. doi: 10.7150/thno.21068 (PMC5667350; doi:10.7150/thno.21068), 2017-08-23
Supplement: thnov07p3803s1.pdf [file thnov07p3803s1.pdf]

# **A H<sub>2</sub>O<sub>2</sub>-Responsive Theranostic Probe for Endothelial Injury Imaging and Protection**

Cheng-Kun Wang, Juan Cheng, Xing-Guang Liang, Chao Tan, Quan Jiang, Yong-Zhou Hu, Ying-Mei Lu, Kohji Fukunaga, Feng Han and Xin Li

## **Table of Contents**

|                                                       |            |
|-------------------------------------------------------|------------|
| <b>Synthesis and Characterization of AP1-AP4.....</b> | <b>S2</b>  |
| <b>Supplementary Figures</b>                          |            |
| Figure S1.....                                        | S4         |
| Figure S2.....                                        | S4         |
| Figure S3.....                                        | S5         |
| Figure S4.....                                        | S5         |
| Figure S5.....                                        | S6         |
| Figure S6.....                                        | S6         |
| Figure S7.....                                        | S7         |
| Figure S8.....                                        | S7         |
| Figure S9.....                                        | S8         |
| Figure S10.....                                       | S8         |
| Figure S11.....                                       | S9         |
| Figure S12.....                                       | S9         |
| Figure S13.....                                       | S10        |
| Figure S14.....                                       | S10        |
| Figure S15.....                                       | S10        |
| Figure S16.....                                       | S11        |
| Figure S17.....                                       | S11        |
| Figure S18.....                                       | S12        |
| Figure S19.....                                       | S12        |
| Figure S20.....                                       | S13        |
| Figure S21.....                                       | S14        |
| Figure S22.....                                       | S15        |
| Figure S23.....                                       | S15        |
| Figure S24.....                                       | S16        |
| Figure S25.....                                       | S16        |
| Figure S26.....                                       | S16        |
| <b>NMR traces of AP.....</b>                          | <b>S17</b> |

## Synthesis and characterization of AP1-AP4

### General procedures

To a stirred solution of aspirin (2.0 eq) in CH<sub>2</sub>Cl<sub>2</sub> at 0°C was added HOBT (1.5 eq) and EDC•HCl (1.5 eq). After 20 min, the fluorophore (1.0 eq) and *N,N*-diisopropylethylamine (2.5 eq) were added subsequently and the resulting mixture was stirred at ambient temperature and monitored by thin-layer chromatography analysis. After the disappearance of the fluorophore, H<sub>2</sub>O was added to quench the reaction and the mixture was diluted with CH<sub>2</sub>Cl<sub>2</sub>. The biphasic mixture was then transferred to a separatory funnel and the organic layer was washed sequentially with H<sub>2</sub>O and brine, dried over anhydrous Na<sub>2</sub>SO<sub>4</sub>, filtered, and concentrated under reduced pressure. The remaining residue was purified by flash column chromatography (SiO<sub>2</sub>) to give the product.

### Characterization

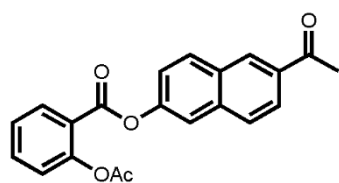

AP1

White solid (87% yield)

**M.p.:** 139.4-140.2 °C

**R<sub>f</sub>** = 0.42 (5:1, petroleum ether:EtOAc).

**<sup>1</sup>H NMR (500 MHz, CDCl<sub>3</sub>, δ):** 8.49 (s, 1H), 8.29 (d, *J* = 8.0, 1H), 8.08 (d, *J* = 8.5 Hz, 1H), 8.04 (d, *J* = 9.0 Hz, 1H), 7.89 (d, *J* = 8.5 Hz, 1H), 7.70 (s, 1H), 7.68 (d, *J* = 8.0 Hz, 1H), 7.44 – 7.40 (m, 2H), 7.22 (d, *J* = 8.0 Hz, 1H), 2.73 (d, *J* = 1.0 Hz, 3H), 2.32 (d, *J* = 1.5 Hz, 3H).

**<sup>13</sup>C NMR (126 MHz, CDCl<sub>3</sub>, δ):** 197.94, 169.85, 162.99, 151.44, 150.37, 136.31, 135.00, 134.67, 132.37, 131.43, 130.80, 130.05, 128.36, 126.40, 124.91, 124.25, 122.43, 122.33, 118.97, 26.80, 21.15.

**IR (KBr, cm<sup>-1</sup>):** 3442, 1676, 1362, 1249, 1142, 902, 745.

**ESI-HRMS (*m/z*):** [M+H]<sup>+</sup> calc'd. for C<sub>21</sub>H<sub>17</sub>O<sub>5</sub>: 349.1076; found 349.1079.

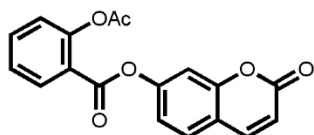

AP2

White solid (79% yield)

**M.p.:** 153.9-155 °C

**R<sub>f</sub>** = 0.52 (4:1, petroleum ether:EtOAc).

**<sup>1</sup>H NMR (500 MHz, CDCl<sub>3</sub>, δ):** 8.23 (dd, *J* = 8.0, 1.5 Hz, 1H), 7.72 (d, *J* = 10.0 Hz, 1H), 7.70 (dt, *J* = 7.8, 1.5 Hz, 1H), 7.55 (d, *J* = 8.5 Hz, 1H), 7.43 (td, *J* = 7.5, 1.0 Hz, 1H), 7.22 (d, *J* = 2.5 Hz, 1H), 7.21 (dd, *J* = 8.0, 1.0 Hz, 1H), 7.16 (dd, *J* = 8.5, 2.0 Hz, 1H), 6.43 (d, *J* = 10.0 Hz,

1H) 2.32 (s, 3H).

**<sup>13</sup>C NMR (126 MHz, CDCl<sub>3</sub>, δ):** 169.75, 162.42, 160.38, 154.94, 153.21, 151.53, 142.93, 135.24, 132.32, 128.86, 126.43, 124.31, 122.03, 118.68, 117.09, 116.43, 110.83, 21.13.

**IR (KBr, cm<sup>-1</sup>):** 3431, 1740, 1512, 1483, 1401, 1244, 1048, 915, 754.

**ESI-HRMS (*m/z*):** [M+H]<sup>+</sup> calc'd. for C<sub>18</sub>H<sub>13</sub>O<sub>6</sub>: 325.0712; found 325.0729.

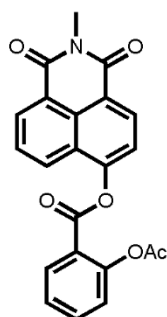

**AP3**

White solid (44% yield)

**M.p.:** 181.6-183.3 °C

**R<sub>f</sub>** = 0.40 (5:1, petroleum ether:EtOAc).

**<sup>1</sup>H NMR (500 MHz, CDCl<sub>3</sub>, δ):** 8.67-8.64 (m, 2H), 8.39 (dd, *J* = 8.0, 1.5 Hz, 1H), 8.31 (dd, *J* = 8.5, 1.0 Hz, 1H), 7.80-7.77 (m, 1H), 7.76 (td, *J* = 7.8, 1.5 Hz, 1H), 7.64 (d, *J* = 8.0 Hz, 1H), 7.50 (dt, *J* = 7.5, 1.0 Hz, 1H), 7.27 (dd, *J* = 8.0, 1.0 Hz, 1H), 3.58 (s, 3H), 2.26 (s, 3H).

**<sup>13</sup>C NMR (126 MHz, CDCl<sub>3</sub>, δ):** 169.80, 164.43, 163.89, 162.32, 151.76, 151.67, 135.60, 132.38, 131.94, 131.92, 129.48, 128.02, 127.63, 126.62, 125.55, 124.54, 123.05, 121.78, 120.82, 119.88, 27.22, 21.11.

**IR (KBr, cm<sup>-1</sup>):** 3438, 1755, 1660, 1452, 1234, 1148, 1077, 917, 780.

**ESI-HRMS (*m/z*):** [M+H]<sup>+</sup> calc'd. for C<sub>22</sub>H<sub>16</sub>NO<sub>6</sub>: 390.0978; found 390.0980.

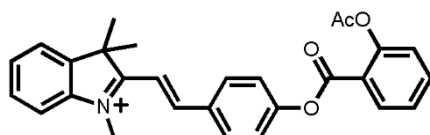

**AP4**

Yellow solid (64% yield)

**M.p.:** 228.9-231.2 °C

**R<sub>f</sub>** = 0.40 (10:1, dichloromethane:MeOH).

**<sup>1</sup>H NMR (500 MHz, CDCl<sub>3</sub>, δ):** 8.26 (s, 1H), 8.25 (d, *J* = 15 Hz, 2H), 8.21 (dd, *J* = 7.5, 1.5 Hz, 1H), 7.84 (d, *J* = 16 Hz, 1H), 7.69-7.64 (m, 2H), 7.60-7.55 (m, 3H), 7.43 (dt, *J* = 7.8, 1.0 Hz, 1H), 7.36 (d, *J* = 8.5 Hz, 2H), 7.20 (dd, *J* = 8.0, 0.5 Hz, 1H), 4.47 (s, 3H), 2.31 (s, 3H), 1.87 (s, 6H), 1.63 (s, 3H).

**<sup>13</sup>C NMR (126 MHz, CDCl<sub>3</sub>, δ):** 182.73, 169.82, 162.44, 154.95, 153.19, 151.42, 143.14, 141.65, 135.16, 132.98, 132.98, 132.36, 131.78, 130.31, 129.90, 126.46, 124.27, 123.09, 123.09, 122.73, 122.19, 115.26, 113.71, 52.88, 37.56, 26.90, 26.90, 21.18.

**IR (KBr, cm<sup>-1</sup>):** 3451, 1752, 1534, 1402, 1213, 1123, 1014, 916, 760.

**ESI-HRMS (*m/z*):** [M+H]<sup>+</sup> calc'd. for C<sub>28</sub>H<sub>26</sub>NO<sub>4</sub><sup>+</sup>: 441.1935; found 441.1937.

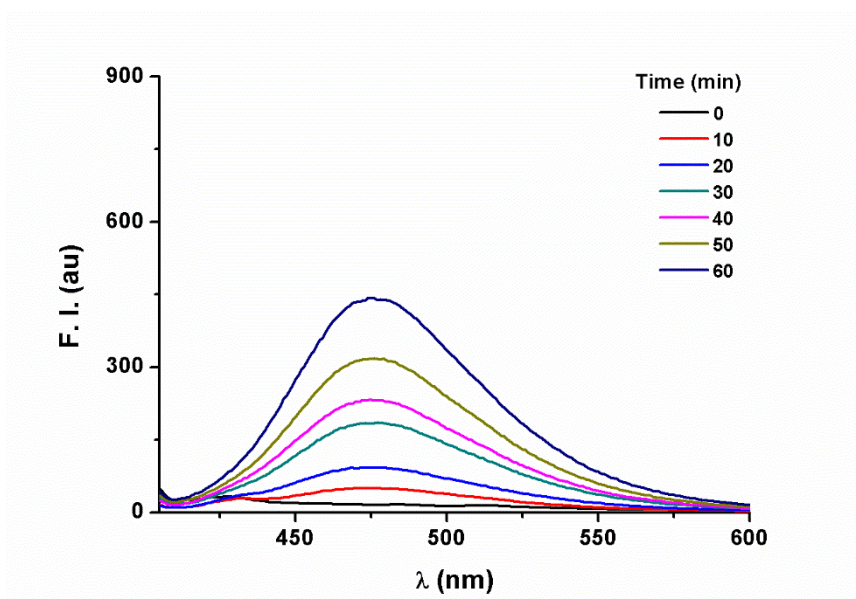

**Figure S1.** Fluorescence response of AP (10 μM) towards H<sub>2</sub>O<sub>2</sub> (100 μM) as time lapsed. Spectra were taken in PBS (pH 7.4, 100 mM) at 37 °C.

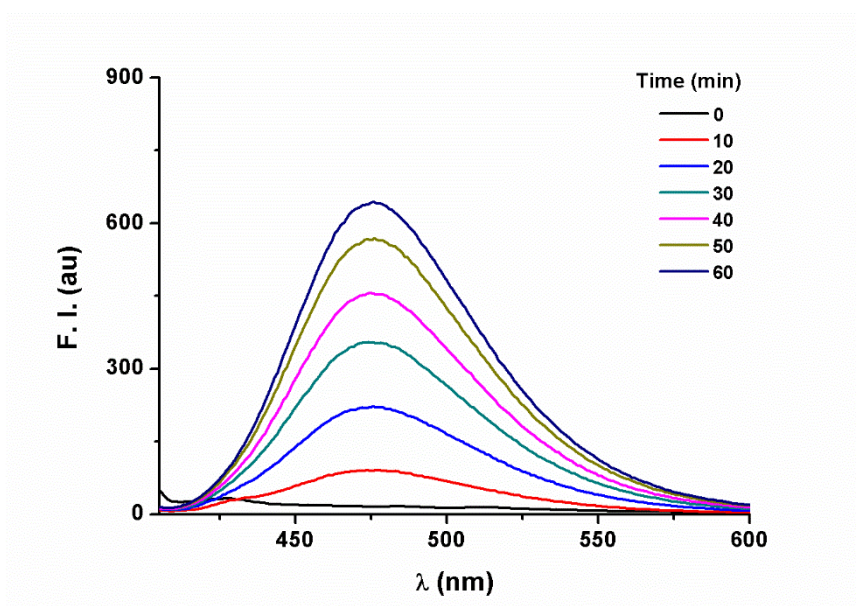

**Figure S2.** Fluorescence response of AP (10 μM) towards H<sub>2</sub>O<sub>2</sub> (300 μM) as time lapsed. Spectra were taken in PBS (pH 7.4, 100 mM) at 37 °C.

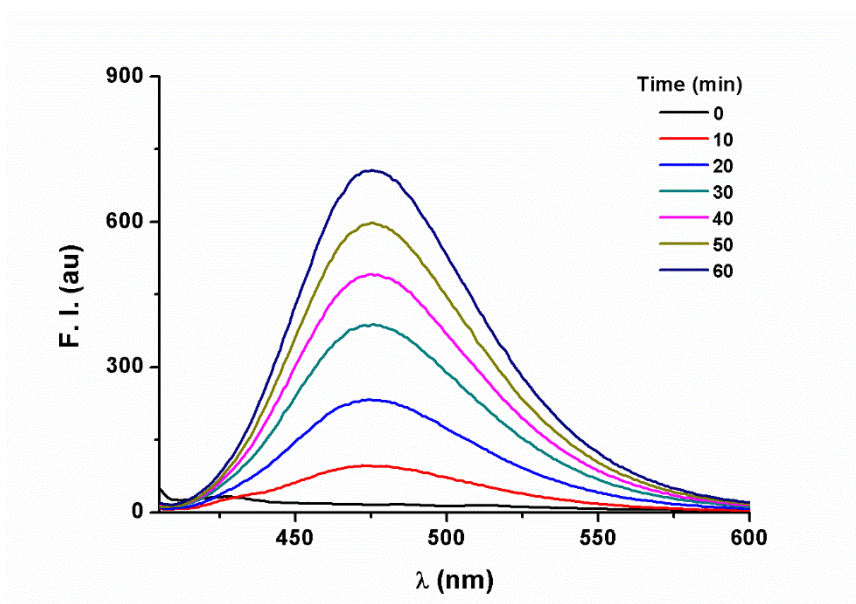

**Figure S3.** Fluorescence response of **AP** (10  $\mu\text{M}$ ) towards  $\text{H}_2\text{O}_2$  (400  $\mu\text{M}$ ) as time lapsed. Spectra were taken in PBS (pH 7.4, 100 mM) at 37  $^\circ\text{C}$ .

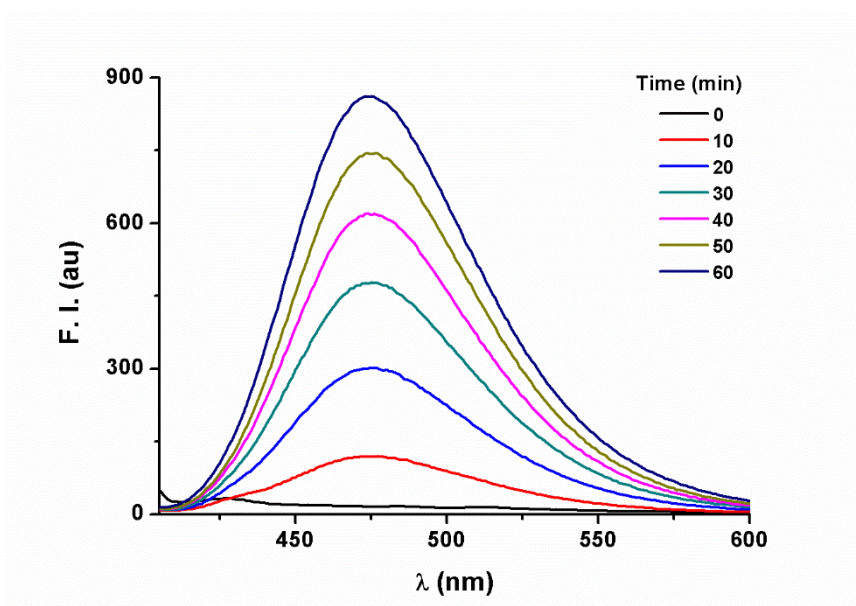

**Figure S4.** Fluorescence response of **AP** (10  $\mu\text{M}$ ) towards  $\text{H}_2\text{O}_2$  (500  $\mu\text{M}$ ) as time lapsed. Spectra were taken in PBS (pH 7.4, 100 mM) at 37  $^\circ\text{C}$ .

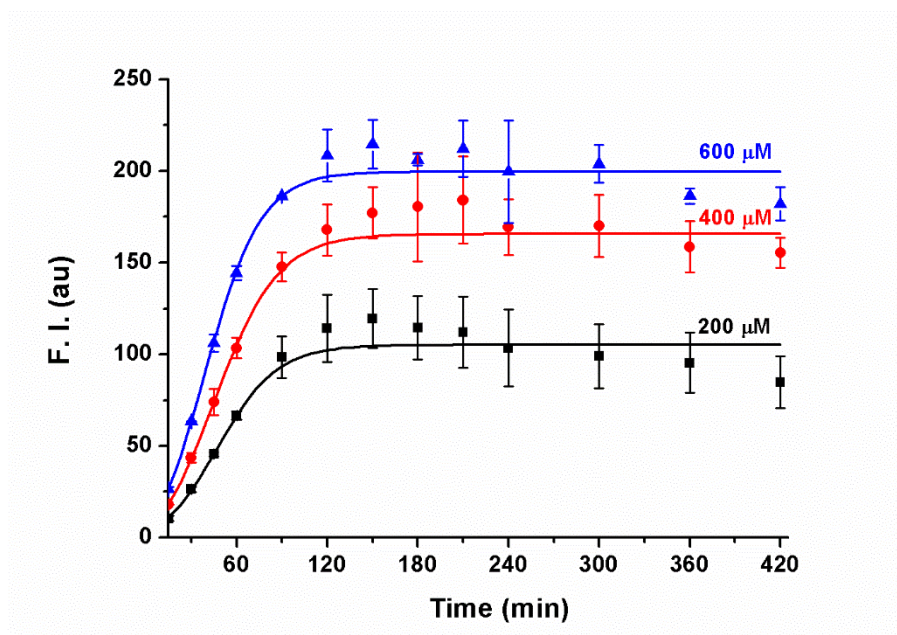

**Figure S5.** Fluorescence intensity of **AP** (10  $\mu\text{M}$ ) at 476 nm after the treatment of  $\text{H}_2\text{O}_2$  (200-600  $\mu\text{M}$ ) for various time. Data were taken in PBS (pH 7.4, 100 mM) at 37  $^\circ\text{C}$ .

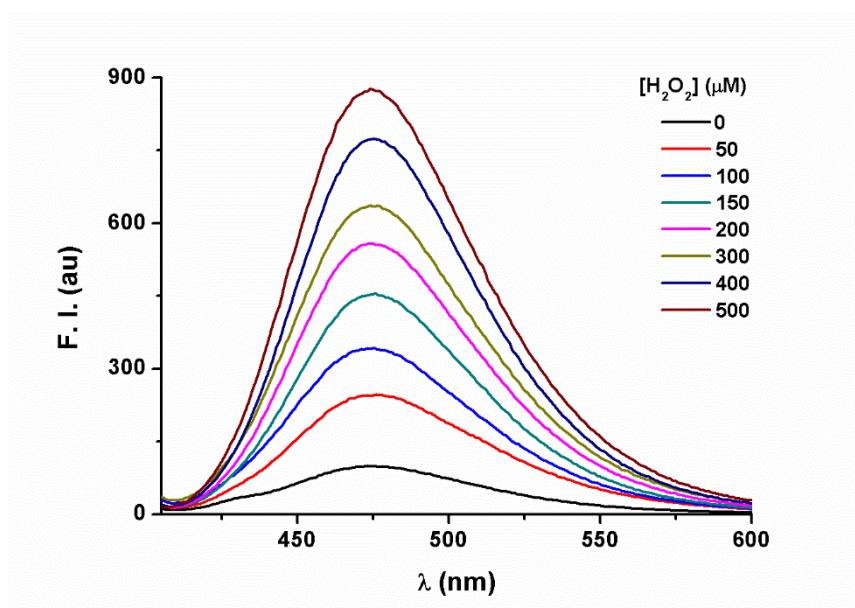

**Figure S6.**  $\text{H}_2\text{O}_2$  dose-dependent fluorescence enhancement of **AP** (10  $\mu\text{M}$ ). Spectra were taken in PBS (pH 7.4, 100 mM) at 37  $^\circ\text{C}$  after an incubation time of 60 min.

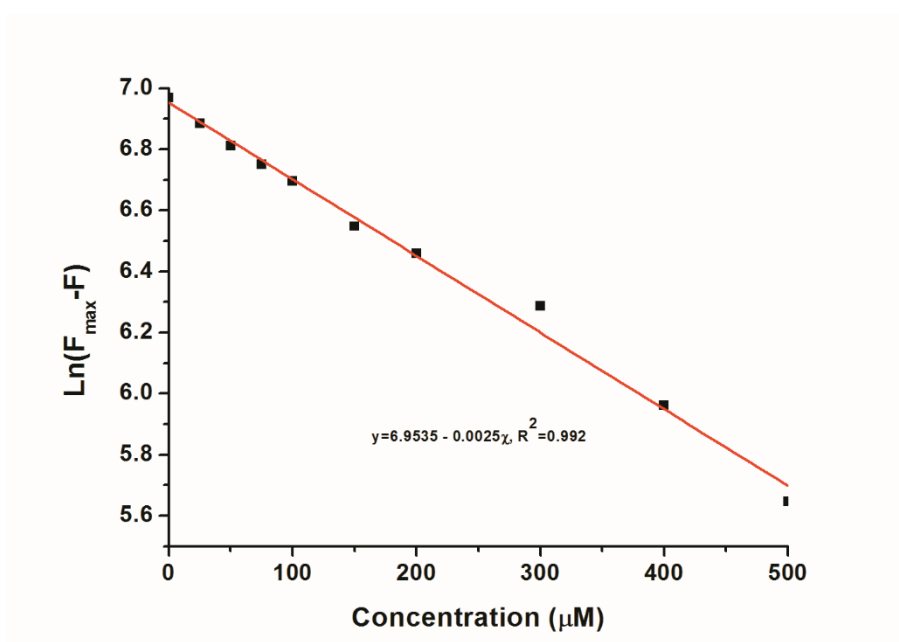

**Figure S7.** The Napierian logarithm of  $F_{\max}$  minus  $F$  correlated linearly with the corresponding  $H_2O_2$  concentrations (0 to 500  $\mu M$ ), and wherein  $F_{\max}$  is the maximum fluorescent intensity at 476 nm of **AP** after the treatment of a large enough amount of  $H_2O_2$ , and  $F$  is the fluorescence after the treatment of corresponding amount of  $H_2O_2$ . Data were acquired in the same way as those in Figure S5.

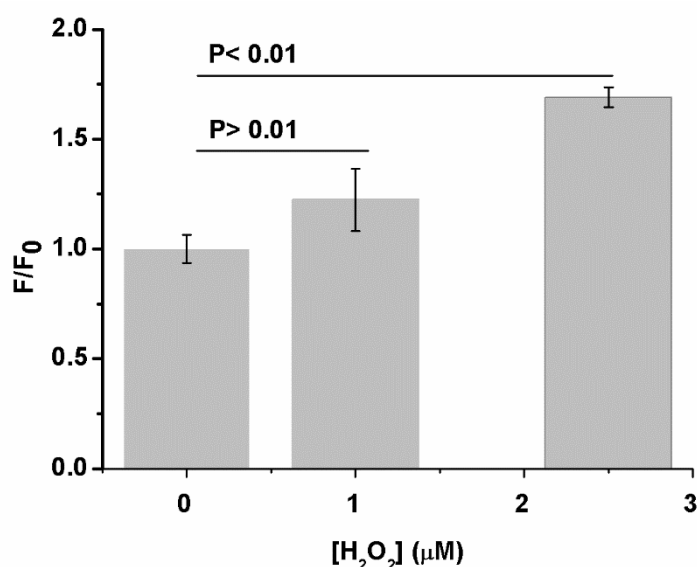

**Figure S8.** The detection limit determination of **AP**. Results were obtained as the concentration of  $H_2O_2$  that induced a statistically significant increase in fluorescence intensity at 476 nm compared with a blank control with a  $p$ -value  $< 0.01$ . Experiments were carried out by incubating **AP** (10  $\mu M$ ) with  $H_2O_2$  (0, 1.0, 2.5  $\mu M$ ) in PBS (100 mM, pH 7.4) at 37°C for 60 min and then collecting the emission at 476 nm by excitation at 375 nm.  $F$ : fluorescence intensity at 476 nm after treating **AP** with various concentrations of  $H_2O_2$ ;  $F_0$ : fluorescence intensity at 476 nm of probe blank control. Statistical analyses were performed with a two-tailed Student's  $t$ -test ( $n = 3$ ). Error bars are standard deviation.

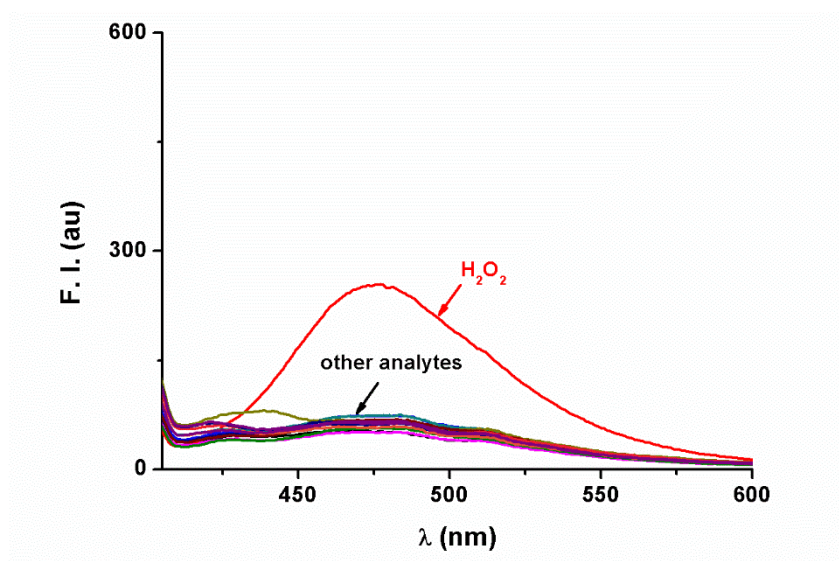

**Figure S9.** Fluorescent spectra of **AP** (10  $\mu\text{M}$ ) in the presence of various bio-relevant reactive species (200  $\mu\text{M}$ ). Spectra were taken in PBS (100 mM, pH 7.4) after an incubation time of 30 min at 37  $^{\circ}\text{C}$  with excitation 375 nm.

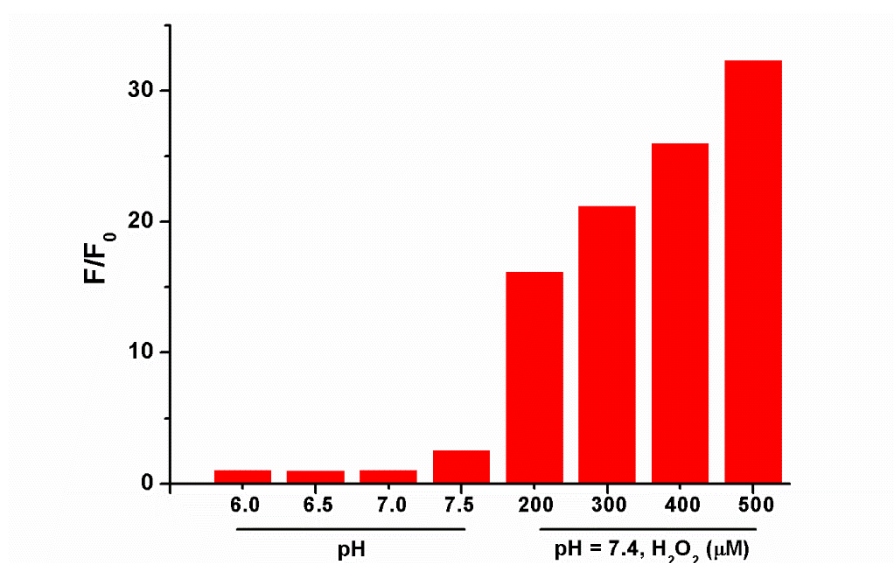

**Figure S10.** The effect of pH on **AP** stability indicated by fluorescence increase. Data shown were the fluorescence increase of **AP** (10  $\mu\text{M}$ ) at 476 nm after 30 min of incubation in PBS of indicated pH, or after being treated with  $\text{H}_2\text{O}_2$  of indicated concentration at pH 7.4.  $F_0$  is the intensity of freshly prepared solutions at indicated pH.

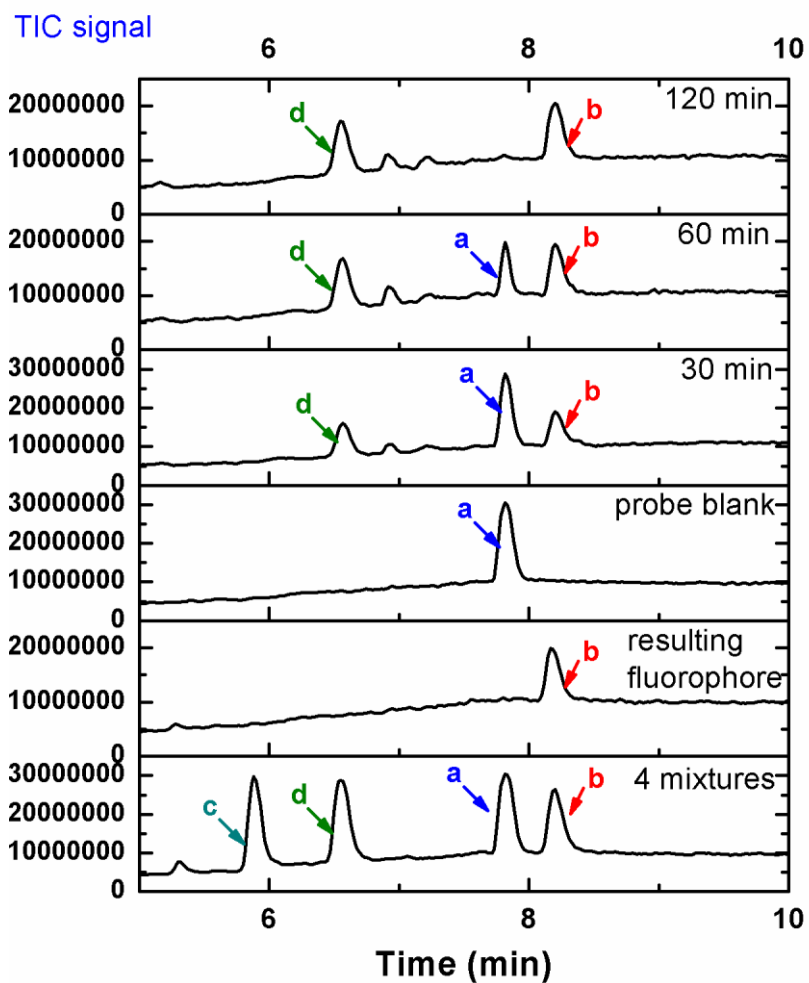

**Figure S11.** The total ion chromatogram (TIC) traces of probe **AP** (a), 2-(2'-hydroxy-4'-fluorophenyl) benzothiazole fluorophore (b), aspirin (c) and salicylic acid (d), and that of the detection reaction.

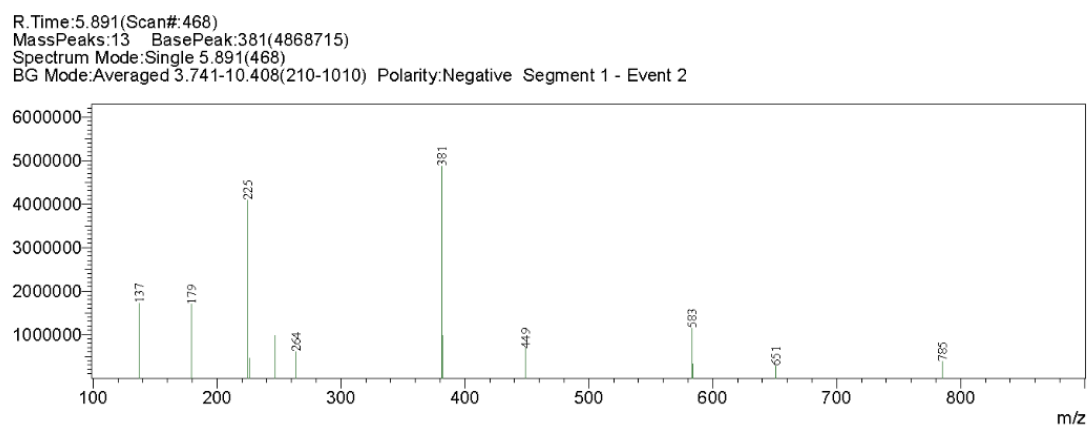

**Figure S12.** MS spectra of aspirin ( $m/z$  179 for  $[M-1]^{-1}$ ) (peak c).

R.Time:6.558(Scan#:548)  
 MassPeaks:12 BasePeak:297(2113946)  
 Spectrum Mode:Single 6.558(548)  
 BG Mode:Averaged 5.525-10.125(424-976) Polarity:Negative Segment 1 - Event 2

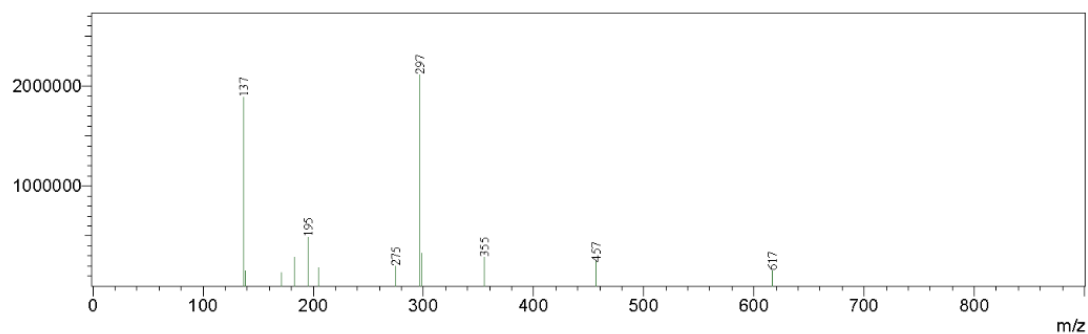

**Figure S13.** MS spectra of salicylic acid ( $m/z$  137 for  $[M-1]^{-1}$ ) (peak d).

R.Time:7.825(Scan#:700)  
 MassPeaks:10 BasePeak:406(3392718)  
 Spectrum Mode:Single 7.825(700)  
 BG Mode:Averaged 7.608-8.808(674-818) Polarity:Negative Segment 1 - Event 2

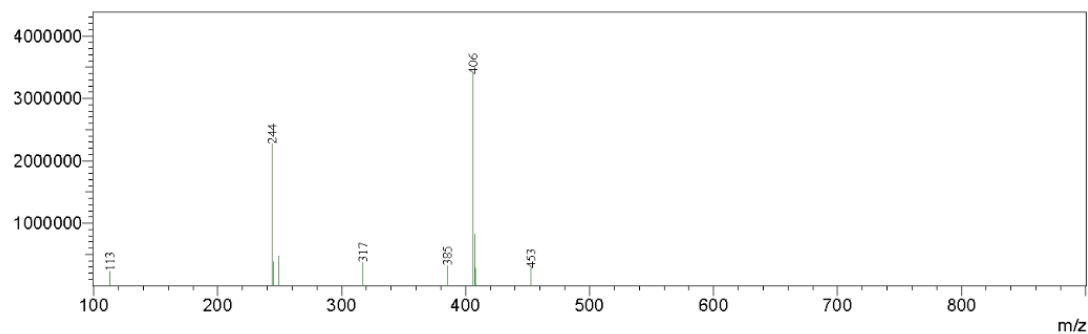

**Figure S14.** MS spectra of AP ( $m/z$  406 for  $[M-1]^{-1}$ ) (peak a).

R.Time:8.191(Scan#:744)  
 MassPeaks:4 BasePeak:244(6715196)  
 Spectrum Mode:Single 8.191(744)  
 BG Mode:Averaged 4.808-12.058(338-1208) Polarity:Negative Segment 1 - Event 2

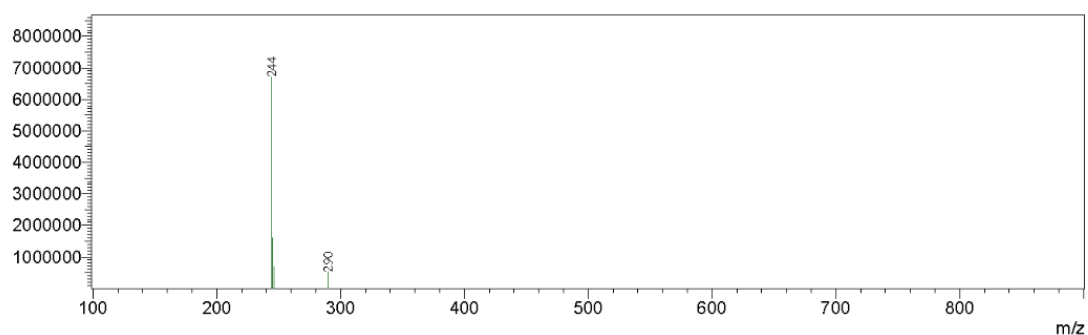

**Figure S15.** MS spectra of 2-(2'-hydroxy-4'-fluorophenyl) benzothiazole fluorophore ( $m/z$  244 for  $[M-1]^{-1}$ ) (peak b).

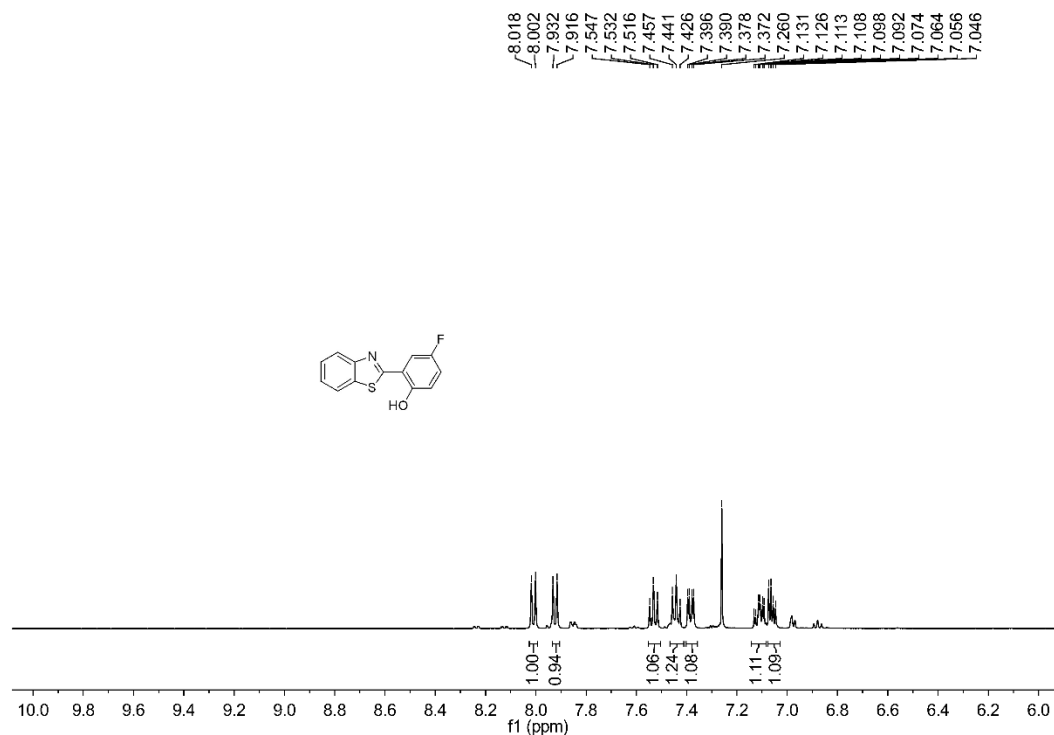

**Figure S16.** <sup>1</sup>H NMR spectra of the fluorophore yielded in the detection reaction. **AP** was reacted with H<sub>2</sub>O<sub>2</sub> in a mixture of PBS and EtOH (1:1) at ambient temperature. The mixture was then extracted with EtOAc. After a quick wash with brine of the EtOAc phase, it was dried over anhydrous Na<sub>2</sub>SO<sub>4</sub>, evaporated and the residue characterized by <sup>1</sup>H NMR.

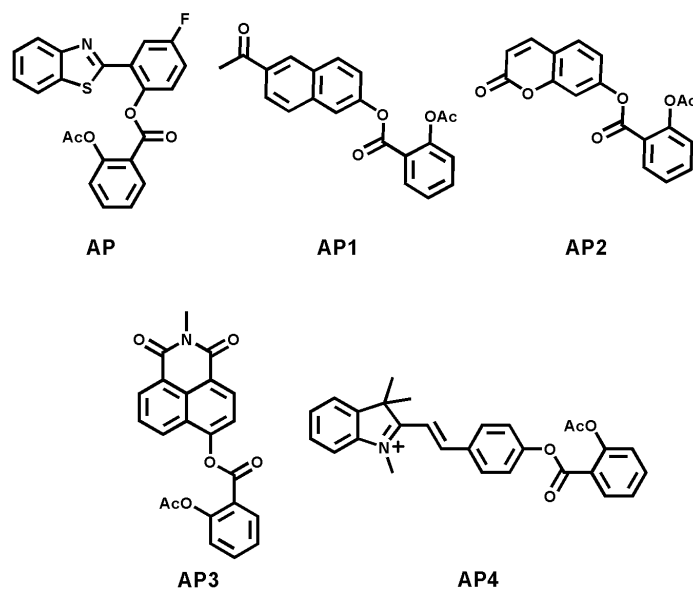

**Figure S17.** Structures of probe **AP1-AP4**.

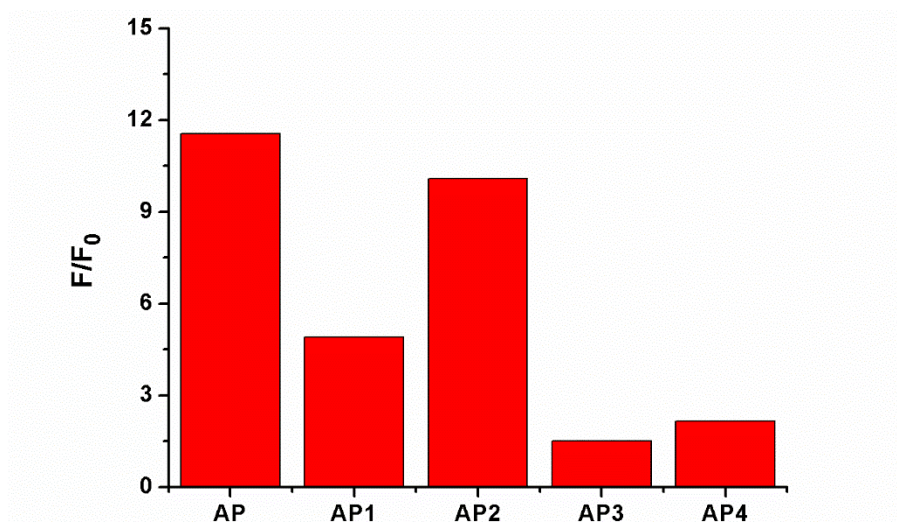

**Figure S18.** Fluorescent responses of probe **AP** or **AP1-AP4** towards  $\text{H}_2\text{O}_2$ . Probes (10  $\mu\text{M}$ ) were treated with  $\text{H}_2\text{O}_2$  (200  $\mu\text{M}$ ) for 30 min at 37°C in PBS (pH 7.4, 100 mM). Then the fluorescence increase in comparison to the freshly prepared probe solutions was recorded by a fluorescence spectrophotometer at 476 nm for **AP** ( $\lambda_{\text{ex}}$  375 nm), 431 nm for **AP1** ( $\lambda_{\text{ex}}$  324 nm), 455 nm for **AP2** ( $\lambda_{\text{ex}}$  324 nm), 551 nm for **AP3** ( $\lambda_{\text{ex}}$  374 nm), 553 nm for **AP4** ( $\lambda_{\text{ex}}$  517 nm).

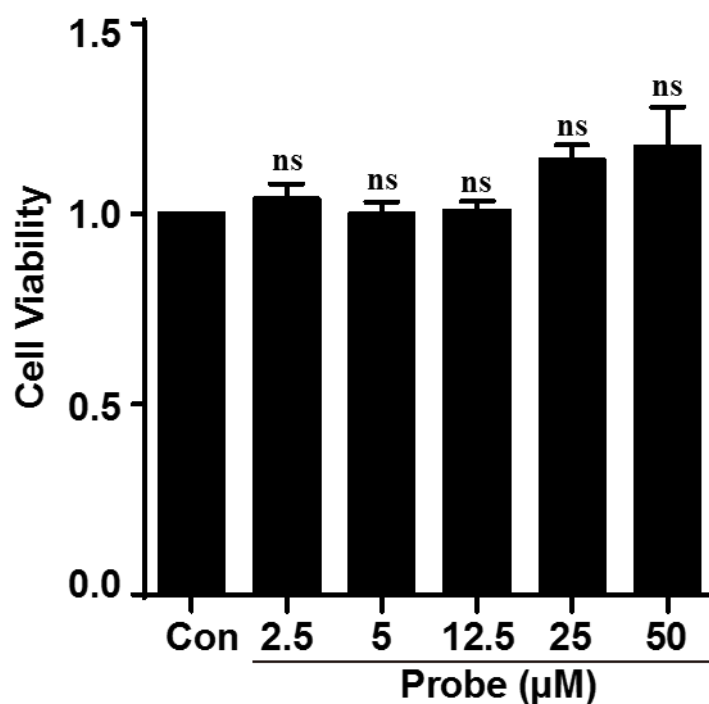

**Figure S19.** Mean cell viability under indicated conditions determined with a Cell Counting Kit-8 assay. EA.hy926 cells were treated with different concentrations of probe **AP** for 24 h, then CCK8 assay was used to check the cytotoxicity of **AP** probe. Ns, no significant changes.

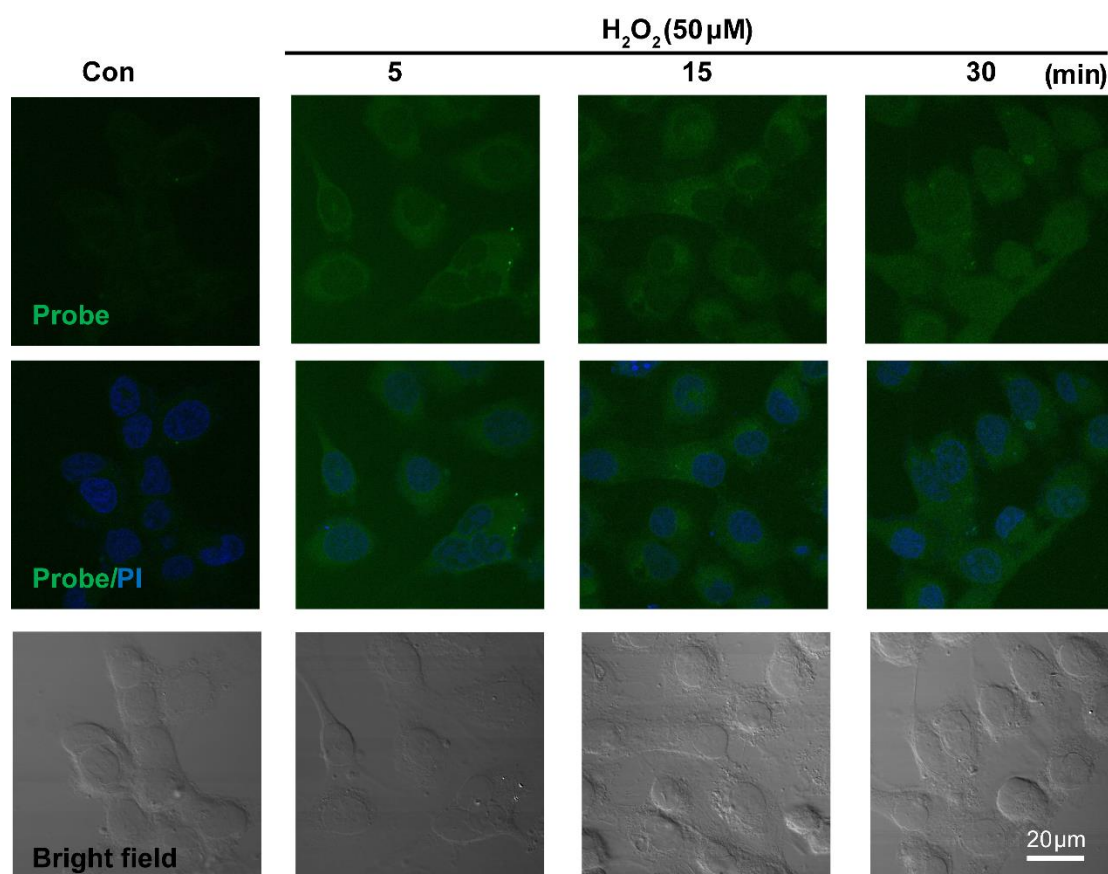

**Figure S20.** Representative confocal images of temporal increase of **AP** fluorescence in endothelial cells. The cells were seeded on 24-well glass cover slips overnight and then pre-incubated with **AP** (5.0 μM) for 15 min, followed by stimulation with or without H<sub>2</sub>O<sub>2</sub> (50 μM) for 5, 15, 30 min. PI counterstaining indicated nuclear localization (blue). All images were captured using a Nikon A1R confocal microscope. Overlay image of all captured fluorescence intensities are shown. Scale bar represents 20 μm.

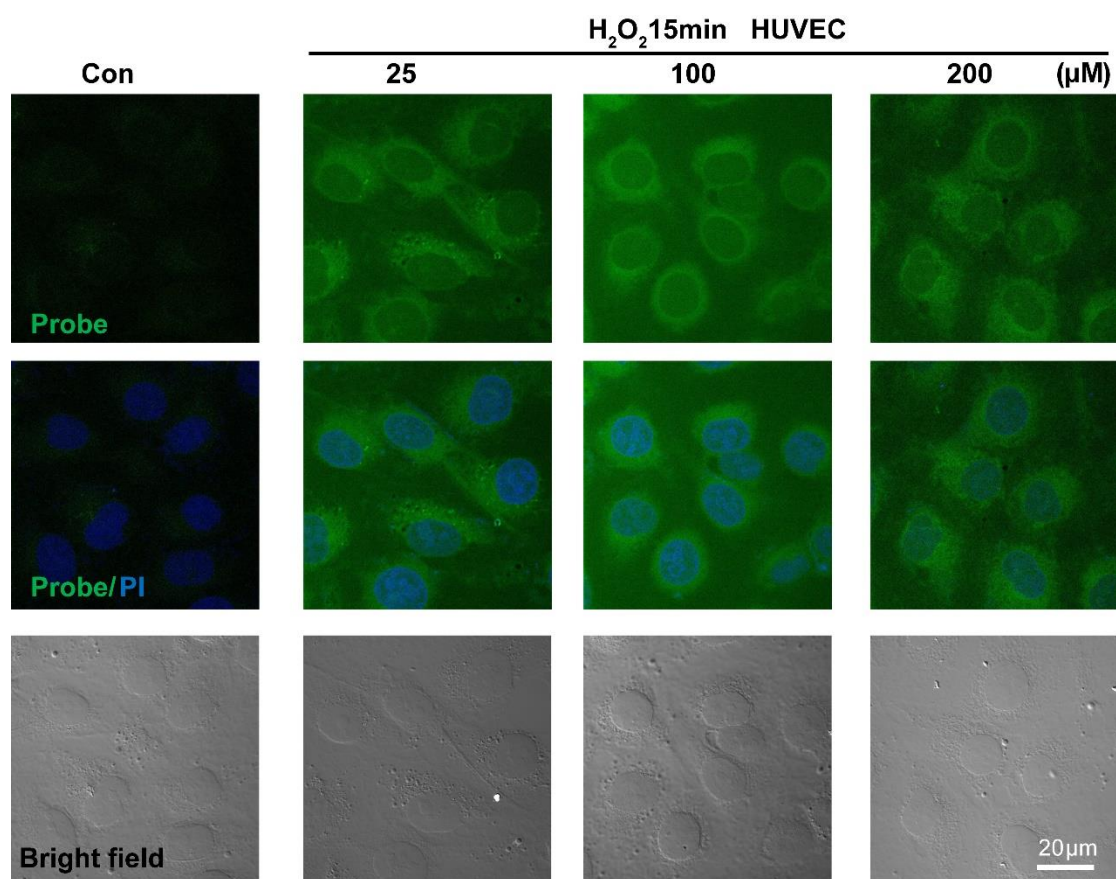

**Figure S21.** Confocal immunofluorescence images of probe **AP** were obtained from HUVEC cells following various concentrations of H<sub>2</sub>O<sub>2</sub> challenge. The cells were seeded on 24-well glass cover slips overnight and then pre-incubated with **AP** (5.0  $\mu$ M) for 15 min, followed by stimulation with or without H<sub>2</sub>O<sub>2</sub> (25-200  $\mu$ M) for 15 min. PI counterstaining indicated nuclear localization (blue). All images were captured using a Nikon A1R confocal microscope. Overlay image of all captured fluorescence intensities are shown. Scale bar represents 20  $\mu$ m.

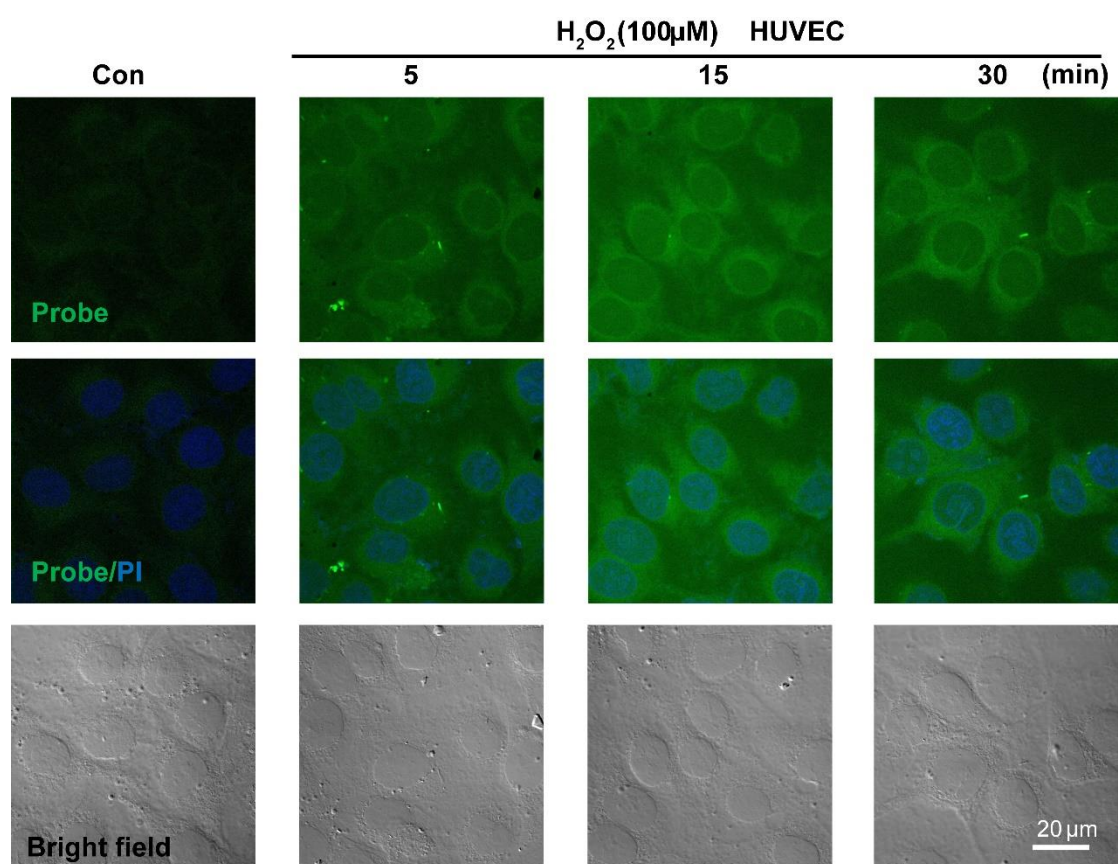

**Figure S22.** Representative confocal images of temporal increase of **AP** fluorescence in HUVEC cells. The cells were seeded on 24-well glass cover slips overnight and then pre-incubated with **AP** (5.0 μM) for 15 min, followed by stimulation with H<sub>2</sub>O<sub>2</sub> (100 μM) for indicated time. PI counterstaining indicated nuclear localization (blue). Overlay image of all captured fluorescence intensities are shown. Scale bar represents 20 μm.

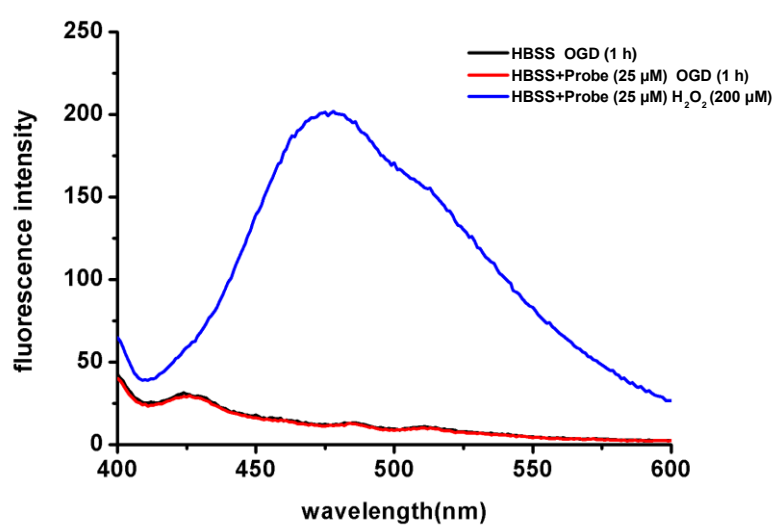

**Figure S23.** OGD agents caused no change to **AP** fluorescence.

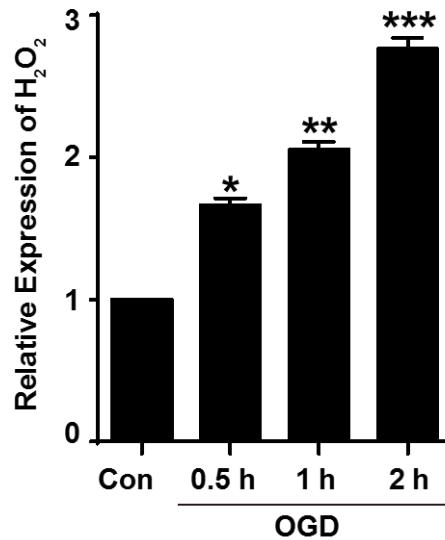

**Figure S24.** The intracellular H<sub>2</sub>O<sub>2</sub> levels were checked using a Hydrogen Peroxide Assay Kit (Beyotime Biotechnology) according to manufacturer instructions. Time-dependent accumulation of H<sub>2</sub>O<sub>2</sub> was observed in EA.hy926 cells over 0.5-2 h following OGD treatment.

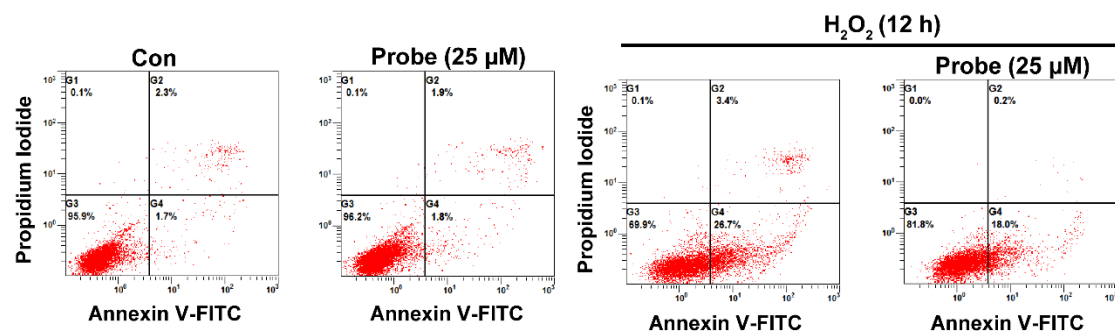

**Figure S25.** Probe AP reduced H<sub>2</sub>O<sub>2</sub>-induced EA.hy926 endothelial apoptosis. The apoptosis of endothelial cells was determined using flow cytometry with annexin V-FITC/propidium iodide (PI). The EA.hy926 cells were seeded on 12-well plates overnight and then pre-incubated with AP (25.0 μM) for 15 min, followed by stimulation with H<sub>2</sub>O<sub>2</sub> (200 μM) for 12 h in DMEM medium.

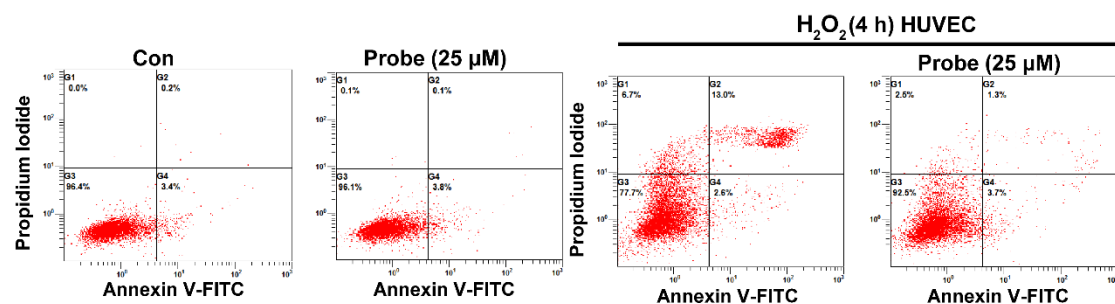

**Figure S26.** The protective role of AP against H<sub>2</sub>O<sub>2</sub>-induced HUVEC apoptosis. The apoptosis of HUVEC cells was determined using flow cytometry with annexin V-FITC/propidium iodide (PI). The cells were seeded on 12-well plates overnight and then pre-incubated with AP (25 μM) for 15 min, followed by stimulation with H<sub>2</sub>O<sub>2</sub> (200 μM) for 4 h in HBSS medium.

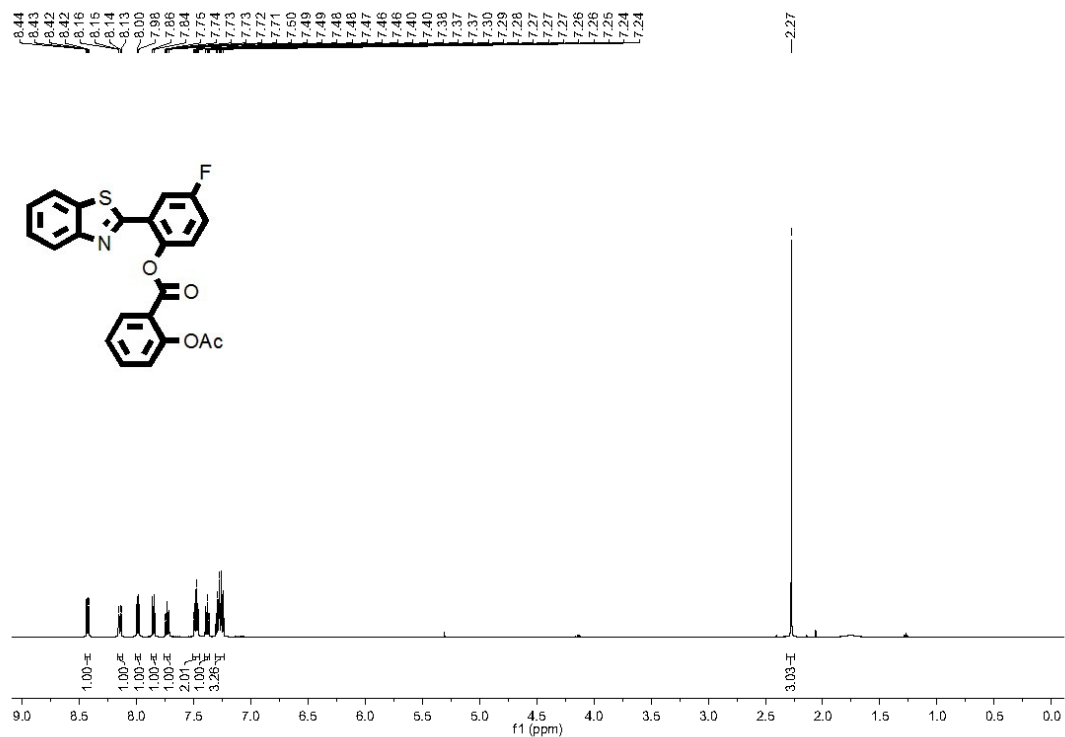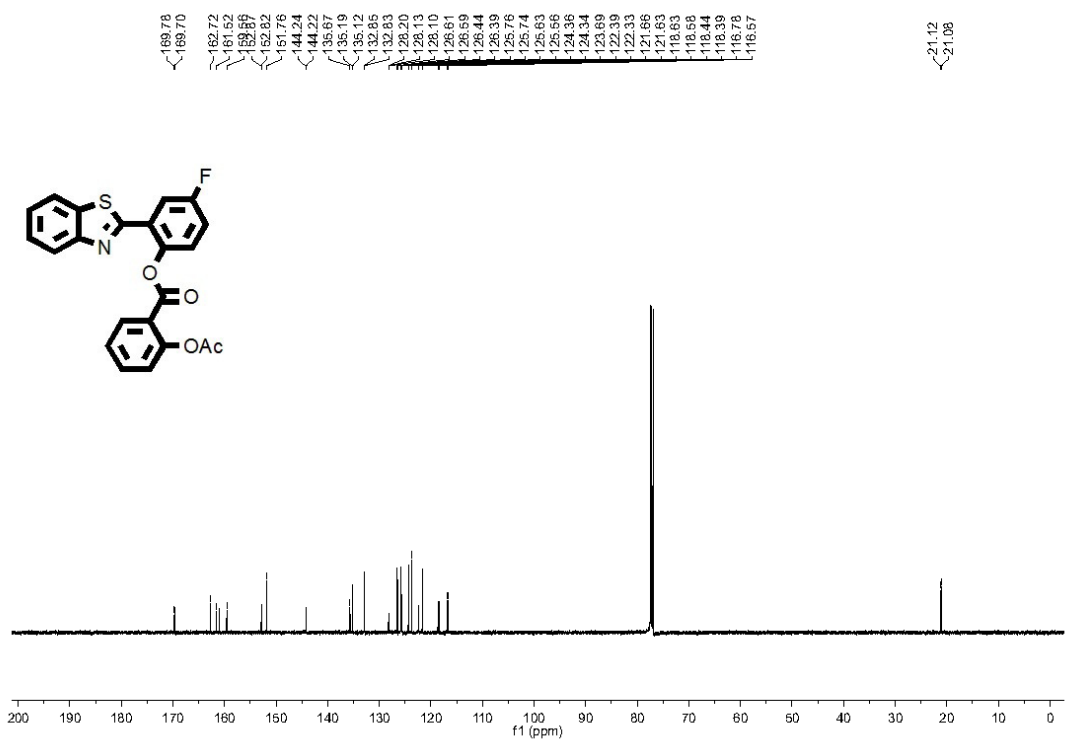

NMR traces of AP
